# Supplementary material for: Aggregation and Its Influence on the Bioactivities of a Novel Antimicrobial Peptide, Temporin-PF, and Its Analogues
Source: MDPI journal article supplement (doi:10.3390/ijms22094509), 2021-04-26
Supplement: s1 [file s1]

M F T L K K S L L L I F F L G T I  
 1ATGTTACCT TGAAGAAATC CCTGTTACTC ATTTTCTTCC TTGGGACCAT  
 TACAAGTGA ACTTCTTTAG GGACAATGAG TAAAAGAAGG AACCTGGTA  
 · N F S L C E Q E R N A D E E Q R R  
 51CAACTTTTCT CTCTGTGAGC AGGAGAGAAA TGCCGATGAG GAACAAAGAA  
 GTTGAAGA GAGACACTCG TCCTCTCTTT ACGGCTACTC CTTGTTTCTT  
 · D E P E E R D V E V Q K R F L P  
 101GAGACGAGCC AGAGGAAAGA GATGTTGAAG TACAAAAACG TTTTCTACCA  
 CTCTGCTCGG TCTCCTTTCT CTACAACTTC ATGTTTTTGC AAAAGATGGT  
 L I A G L F G K I F G K \*  
 151CTTATCGCAG GCCTGTTTCGG TAAAATTTTC GGAAAATAAC CAAAAATGT  
 GAATAGCGTC CGGACAAGCC ATTTTAAAAAG CCTTTTATTG GTTTTTTACA  
 201TGAAACTTTG GAAAAGAAAT TGGAAATCAT CGGATGTGGA ATATCATTTA  
 ACTTTGAAAC CTTTCTTTTA ACCTTTAGTA GCCTACACCT TATAGTAAAT  
 251GCTAAATGCA CATCAGATGT CTTAAAAAAA AATAAATAAA ACTCTTTACG  
 CGATTTACGT GTAGTCTACA GAATTTTTTTT TTATTTATTT TGAGAAATGC  
 301TCAACTCTAA AAAAAAAAAA AAAAAAAAAA

**Figure S1.** Nucleotide sequence of the cDNA cloned from the skin secretion of *Pelophylax fukienensis* and its predicted peptide sequence. The putative signal peptide and temporin-PF (TPF) are indicated by single underline and double underlines, respectively.

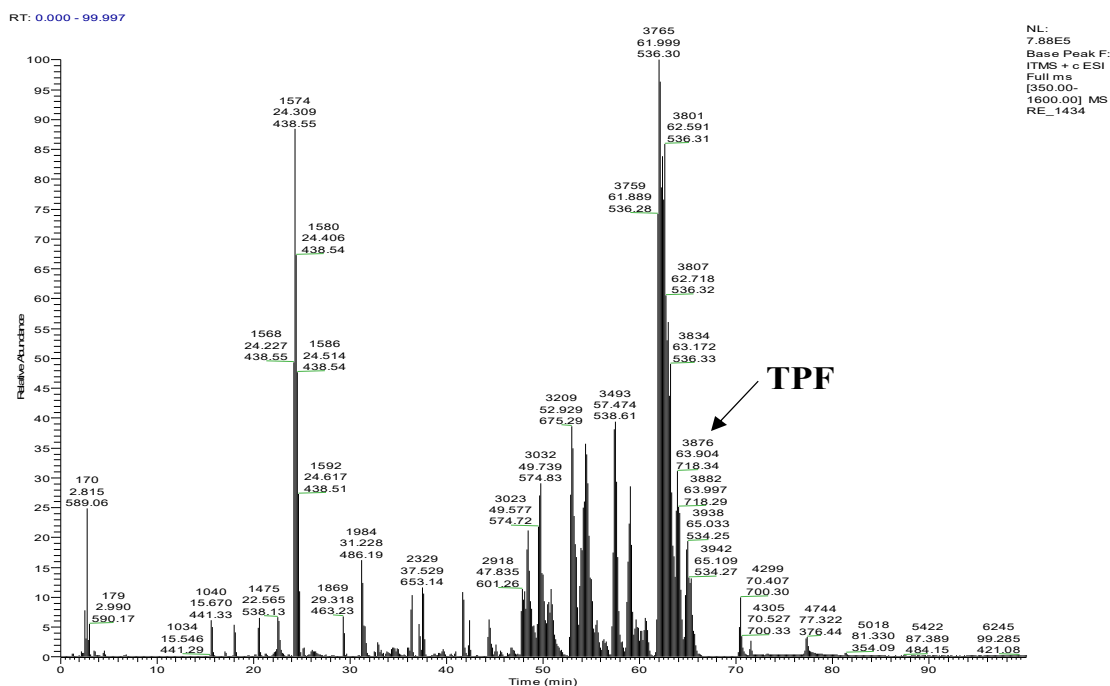

ITMS, CID, z=+1, Mono m/z=1435.56000 Da, MH+=1435.56000 Da, Match Tol.=0.8 Da

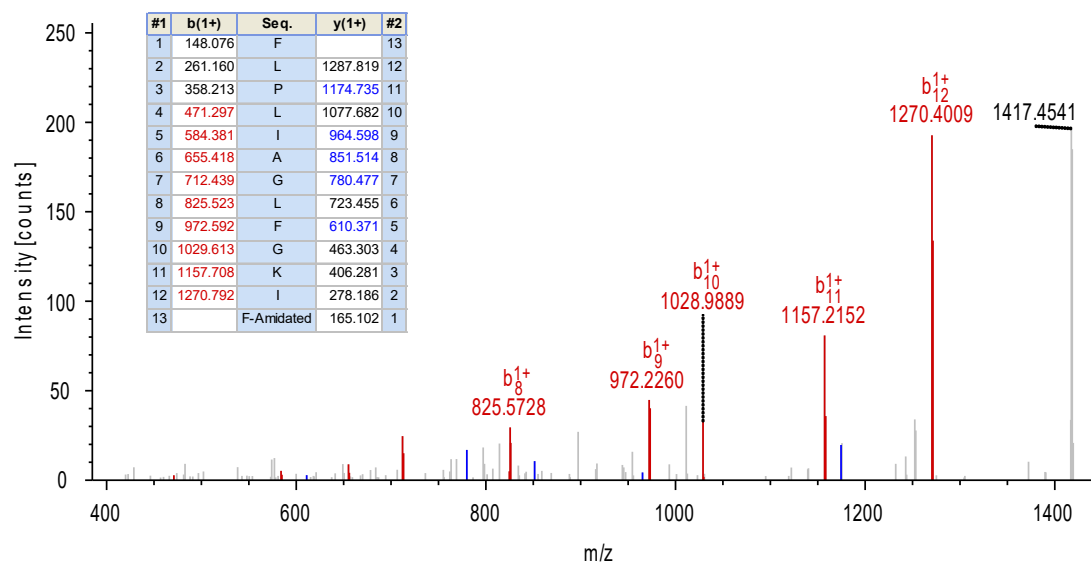

**Figure S2.** Identification of TPF derived from the skin secretion of *Pelophylax fukienensis*: (A) RP-HPLC chromatogram of skin secretion of *P. fukienensis* monitored at 214 nm. The arrow indicates the retention time of QUB-1434. (B) Annotated MS/MS spectrum of QUB-1434. Predicted b- and y-ions arising from collision induced dissociation of the mono-charged (1435.56 m/z, [M+H]<sup>+</sup>) precursor ion. The observed b- and y-ions are indicated in red and blue typefaces.

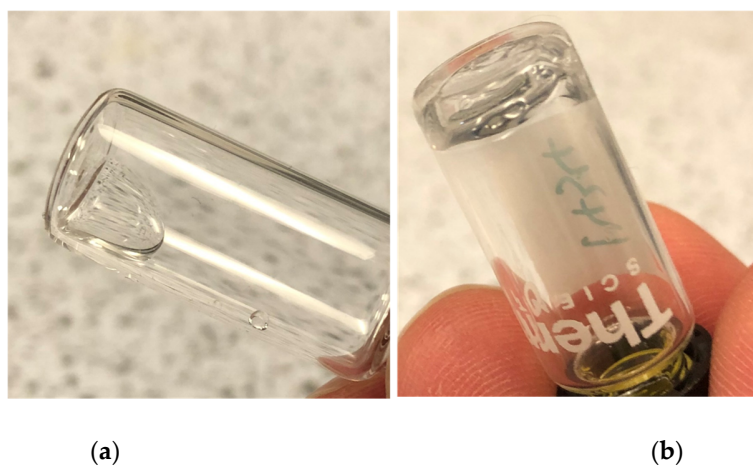

**Figure S3.** The fluidity of (a) PBS and (b) 10 mg/ml TPF in PBS. The peptide is dissolved in PBS and formed hydrogel-like morphology.

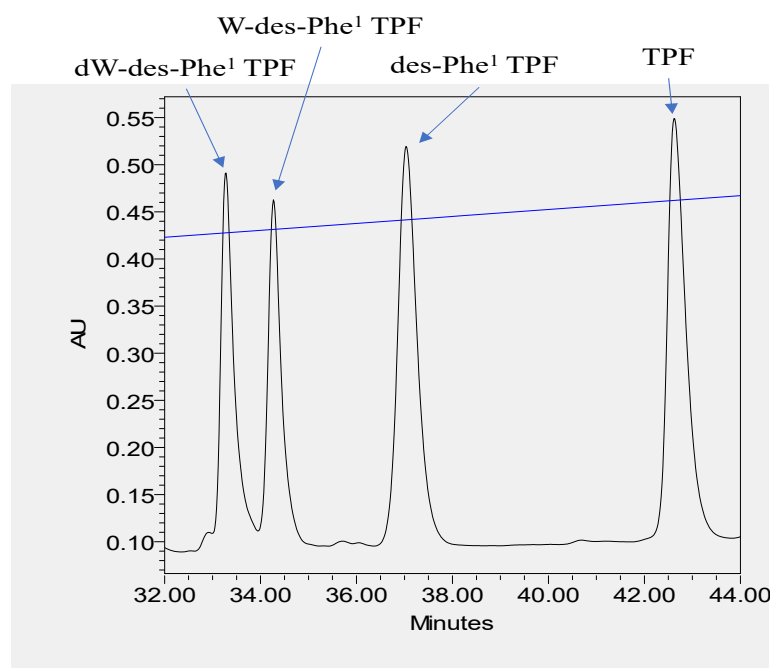

**Figure S4.** The chromatogram of the mixture of TPF analogues. The retention time of each peptide is indicated by arrow. The gradient of mobile phase is presented by a blue line.

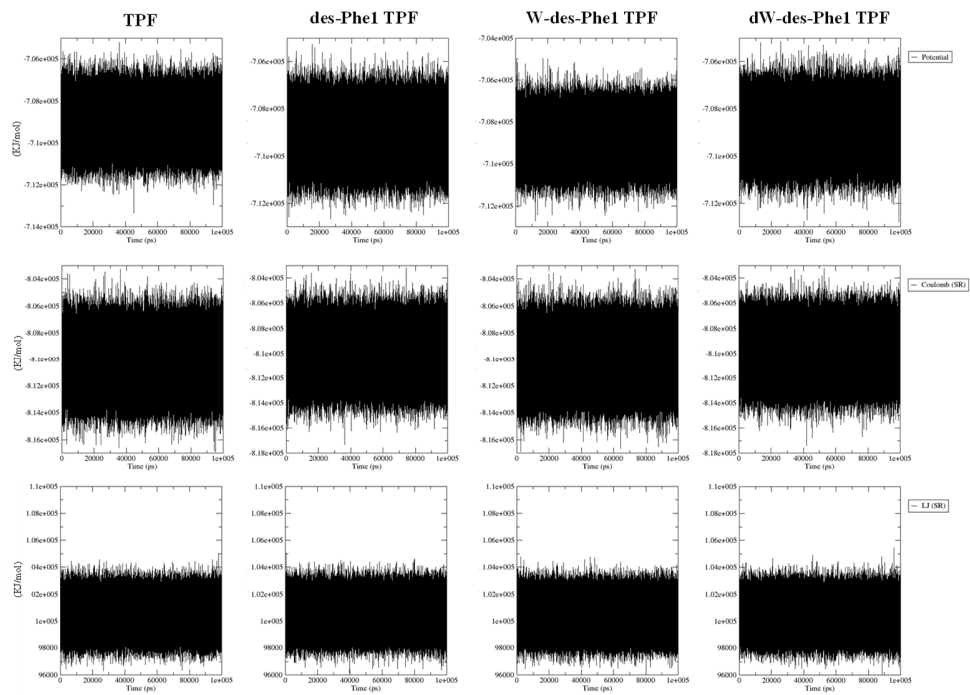

**Figure S5.** The energy analysis of TPF and the analogues monomer during 100 ns MD simulation.

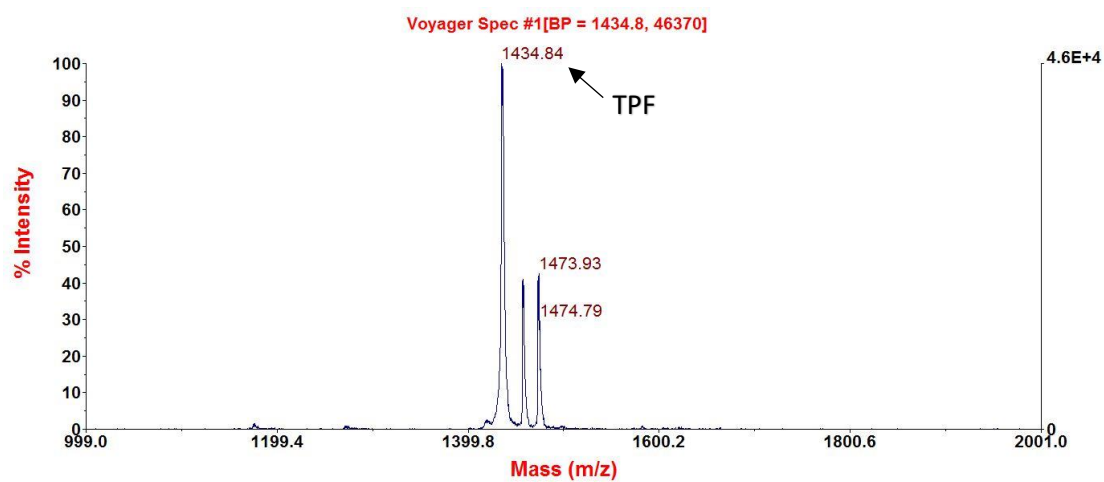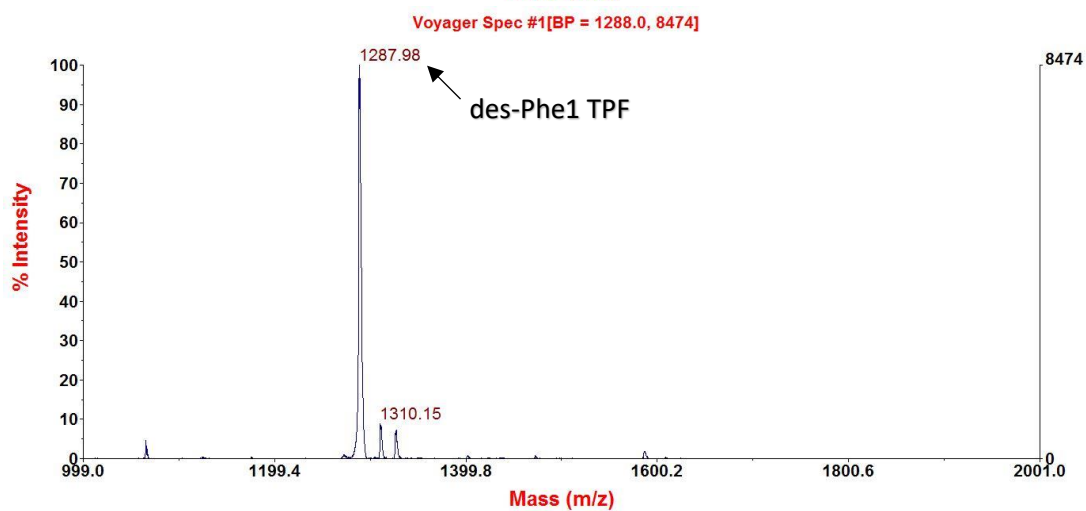

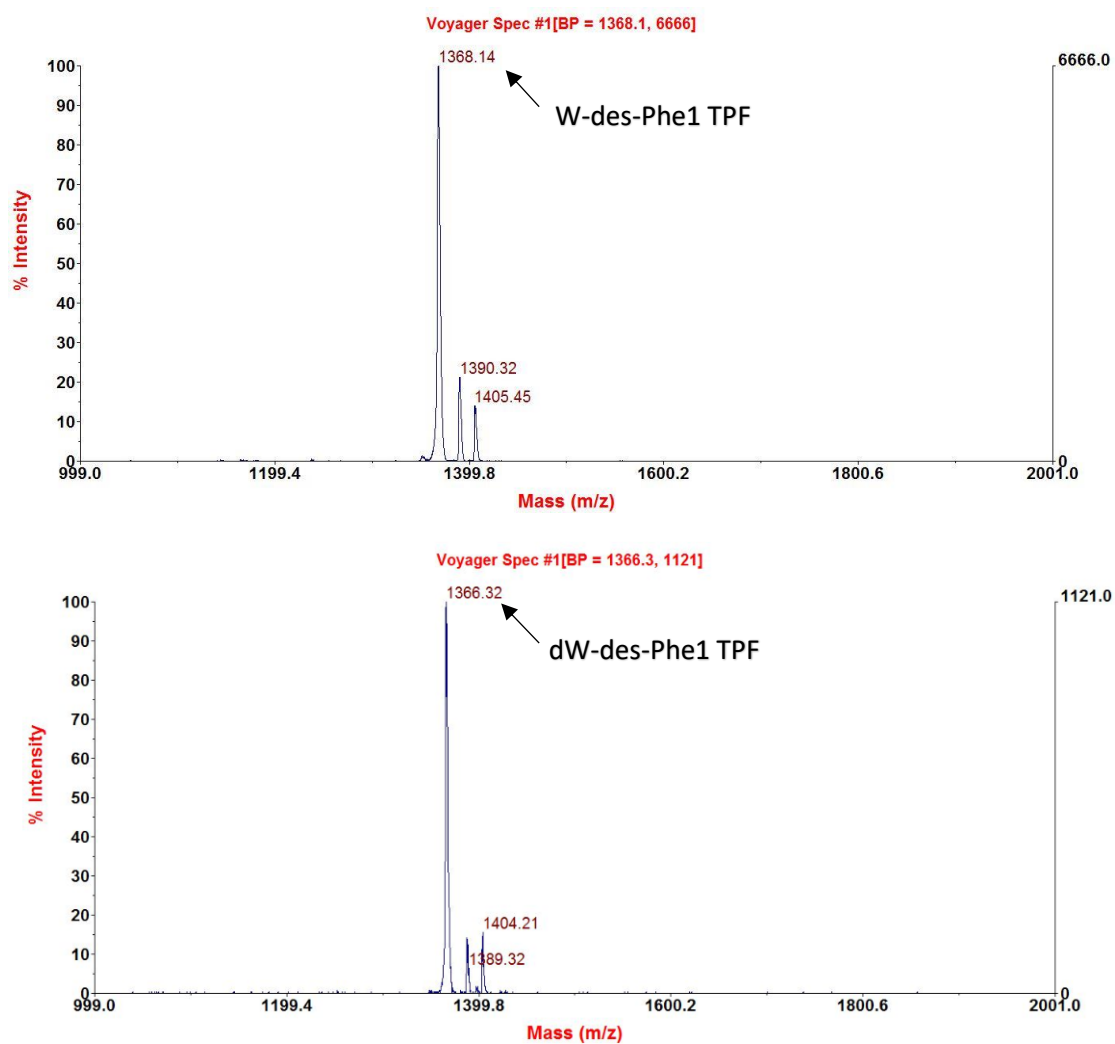

**Figure S6.** Mass of TPF and its analogues identified by matrix-assisted laser desorption ionization, time-of-flight mass spectrometry.

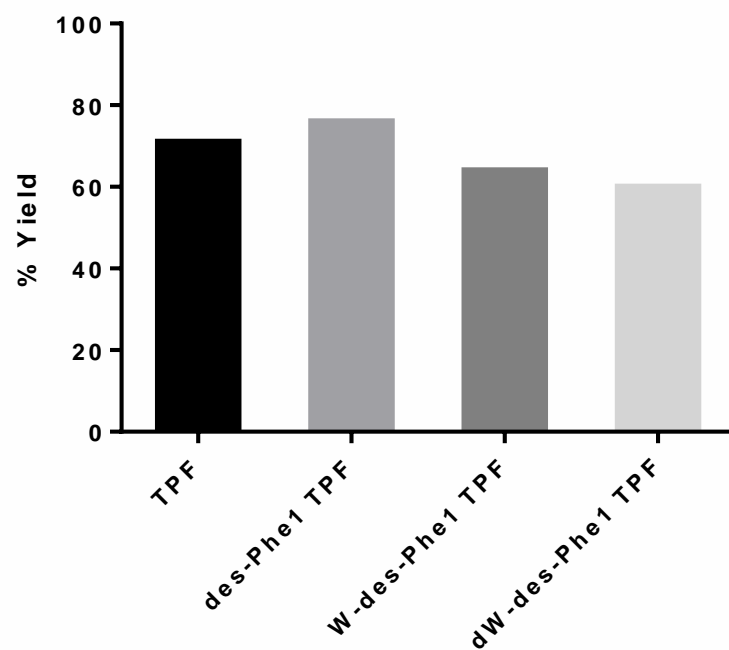

**Figure S7.** Synthetic yield of TPF and its analogues. The yield of TPF, des-Phe1 TPF, W-des-Phe1 TPF and dW-des-Phe1 TPF were 71%, 76%, 64% and 60%, respectively.
